# Supplementary material for: Age‐associated cholesterol reduction triggers brain insulin resistance by facilitating ligand‐independent receptor activation and pathway desensitization
Source: PubMed Central journal article supplement (PMC6516156; doi:10.1111/acel.12932), 2019-03-18

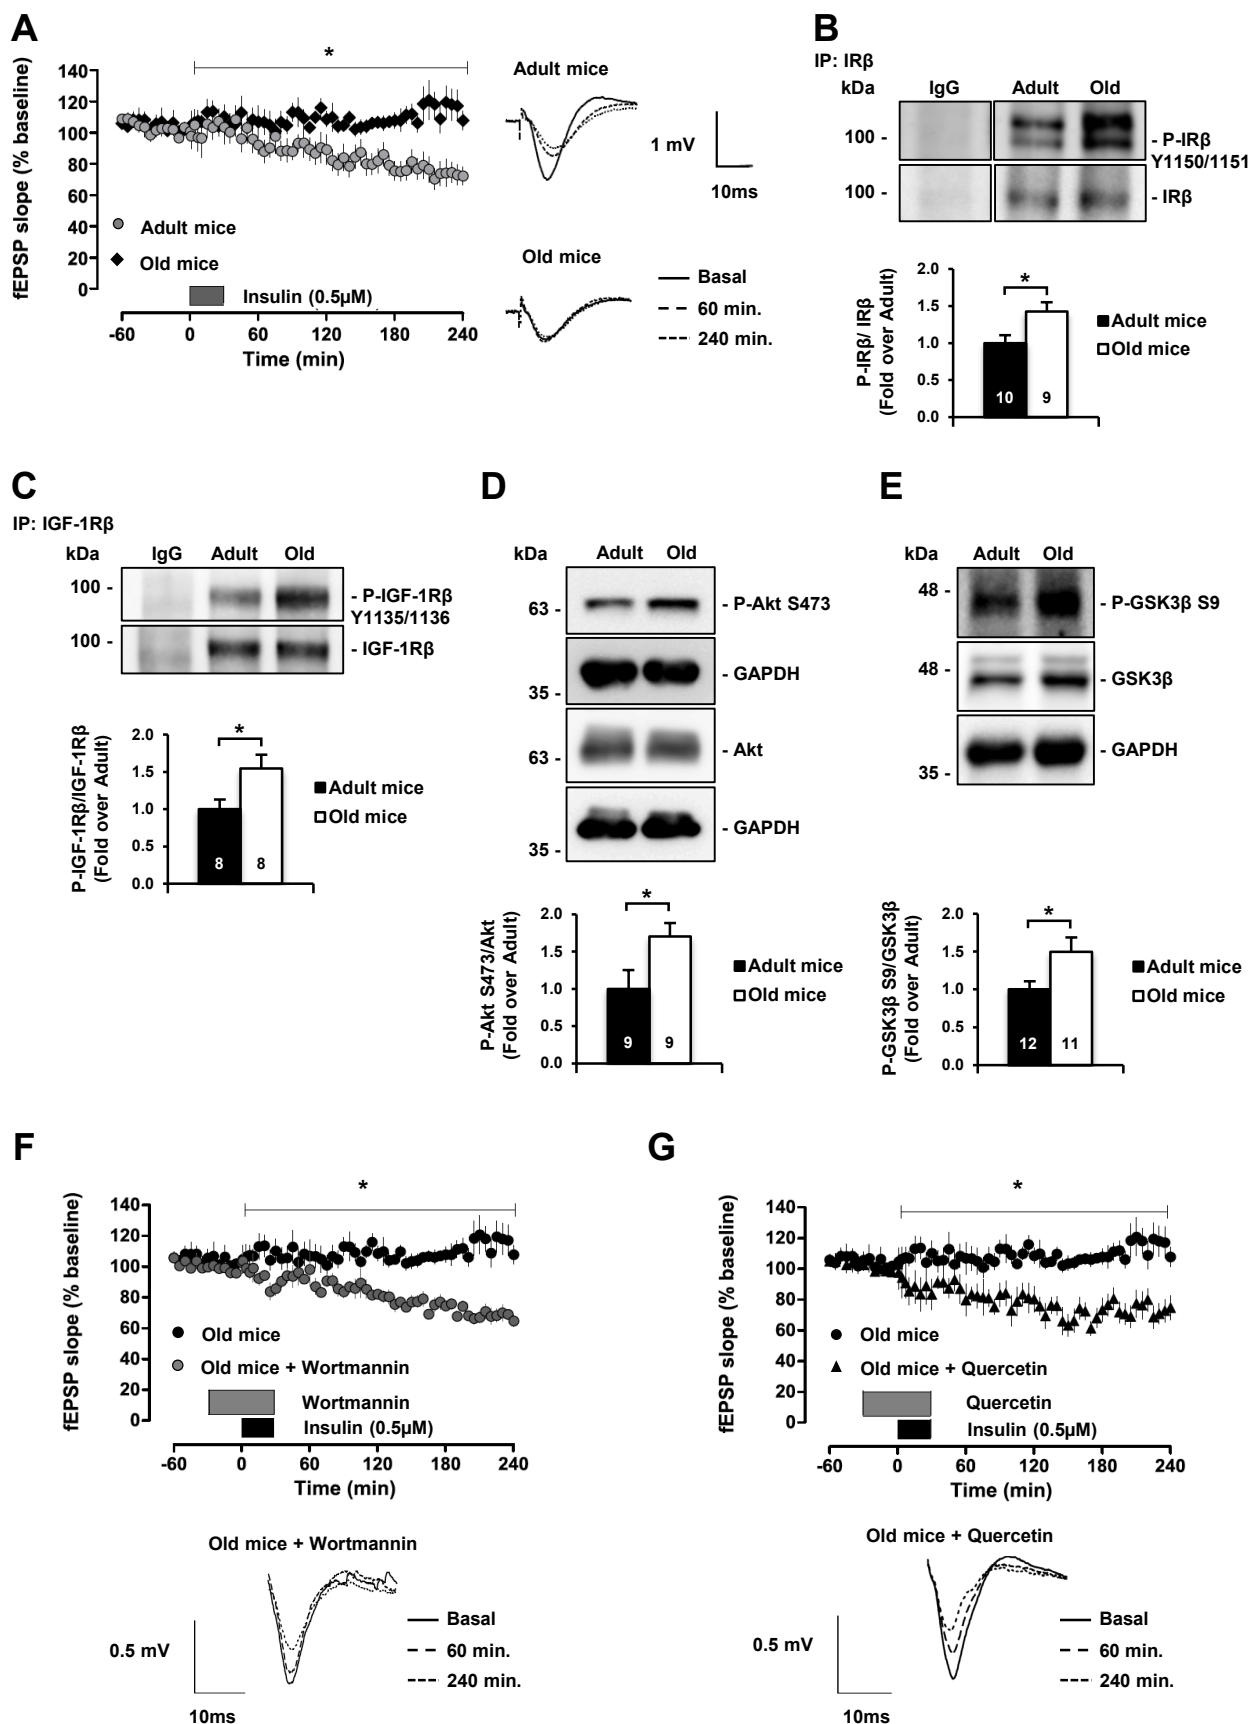

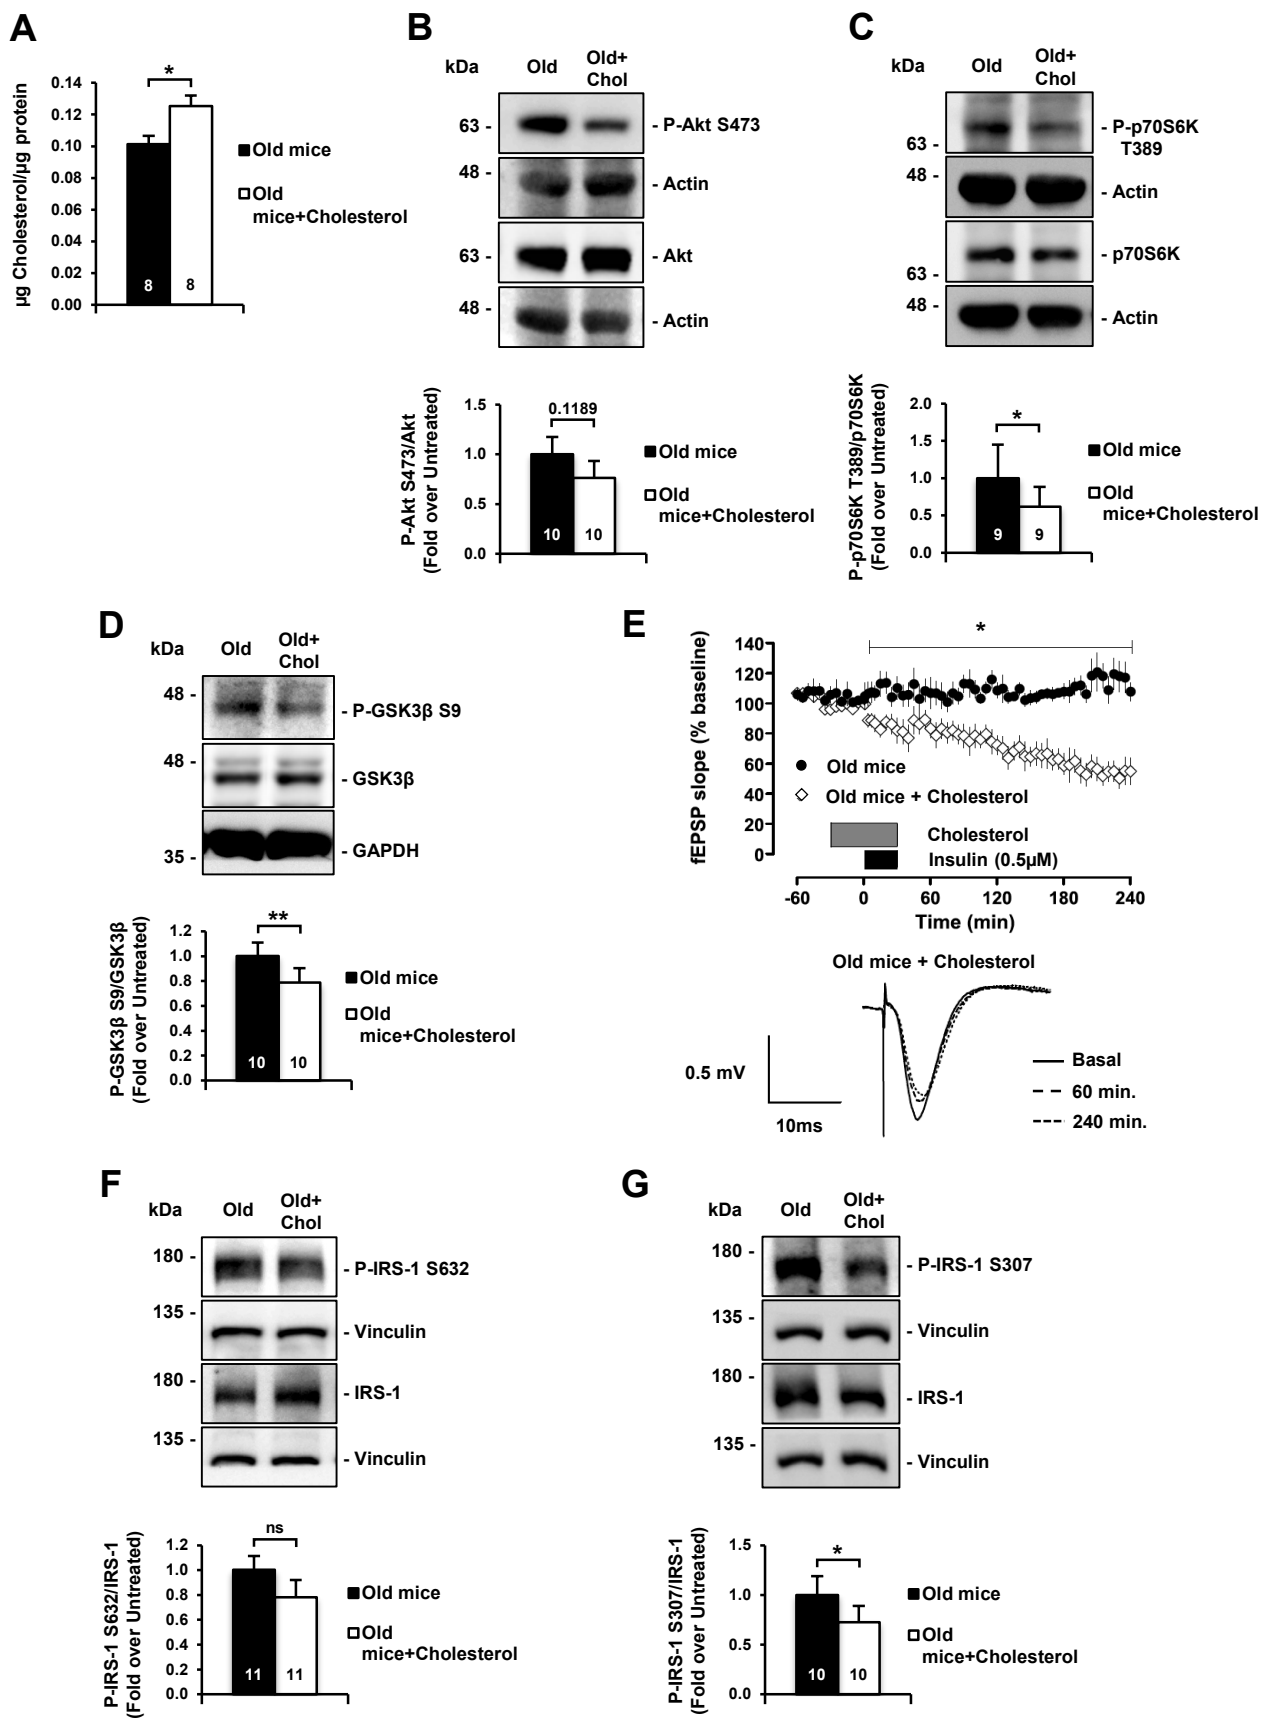

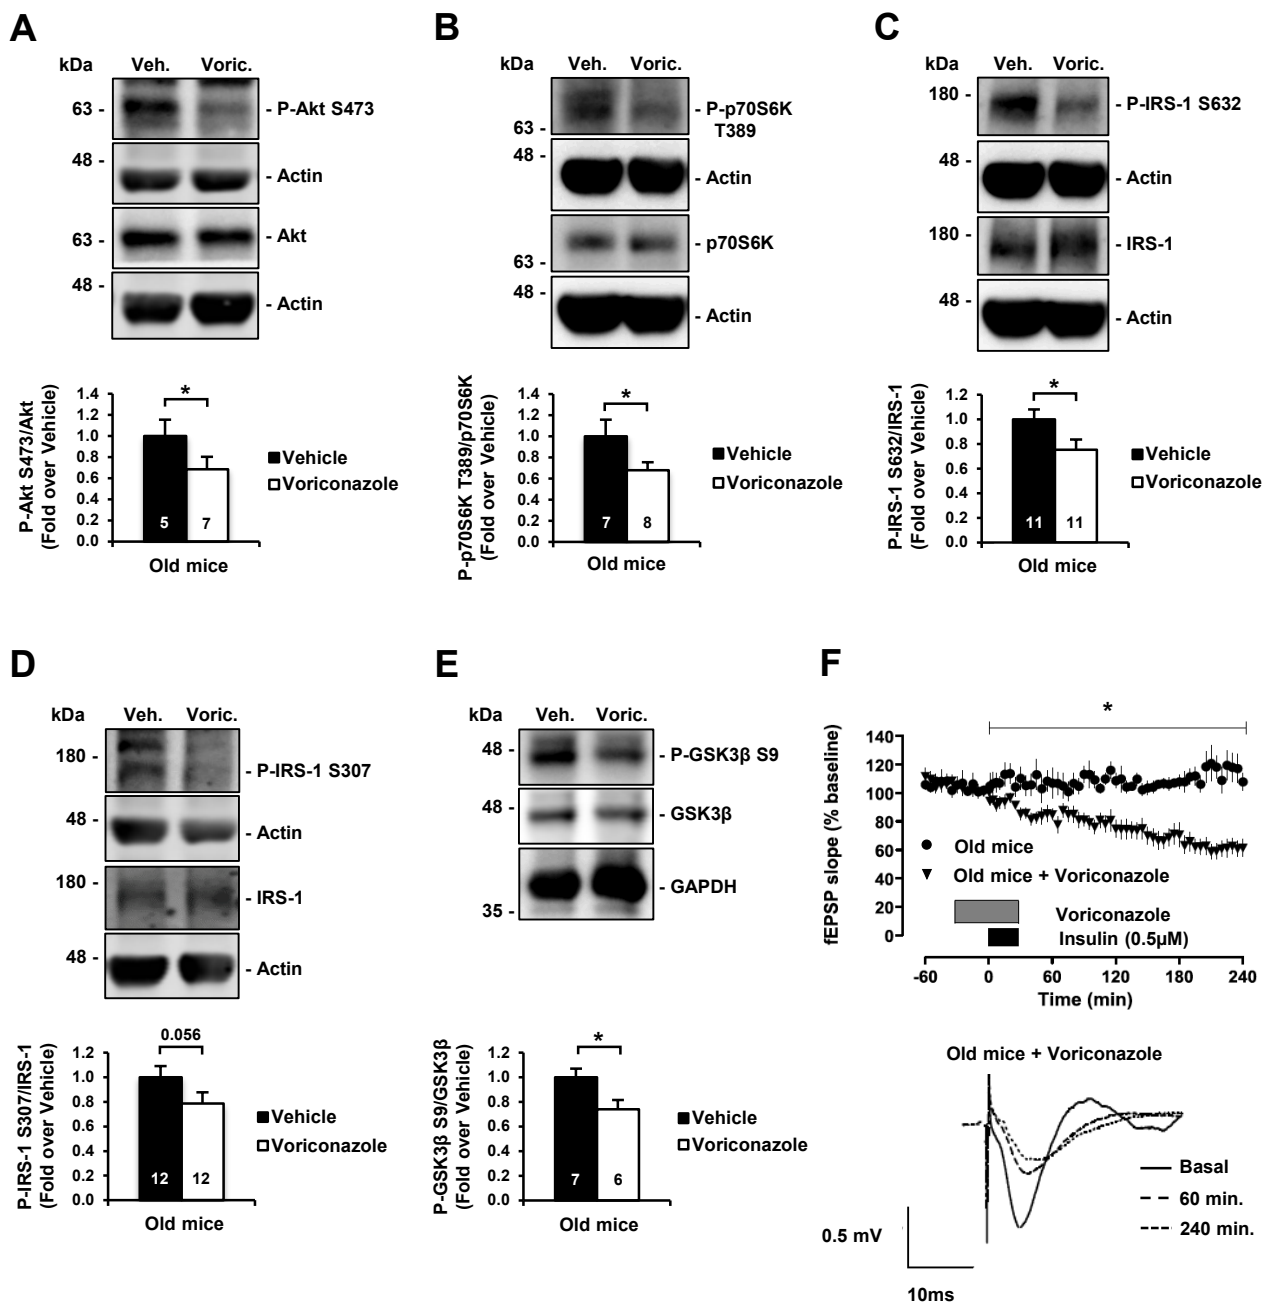

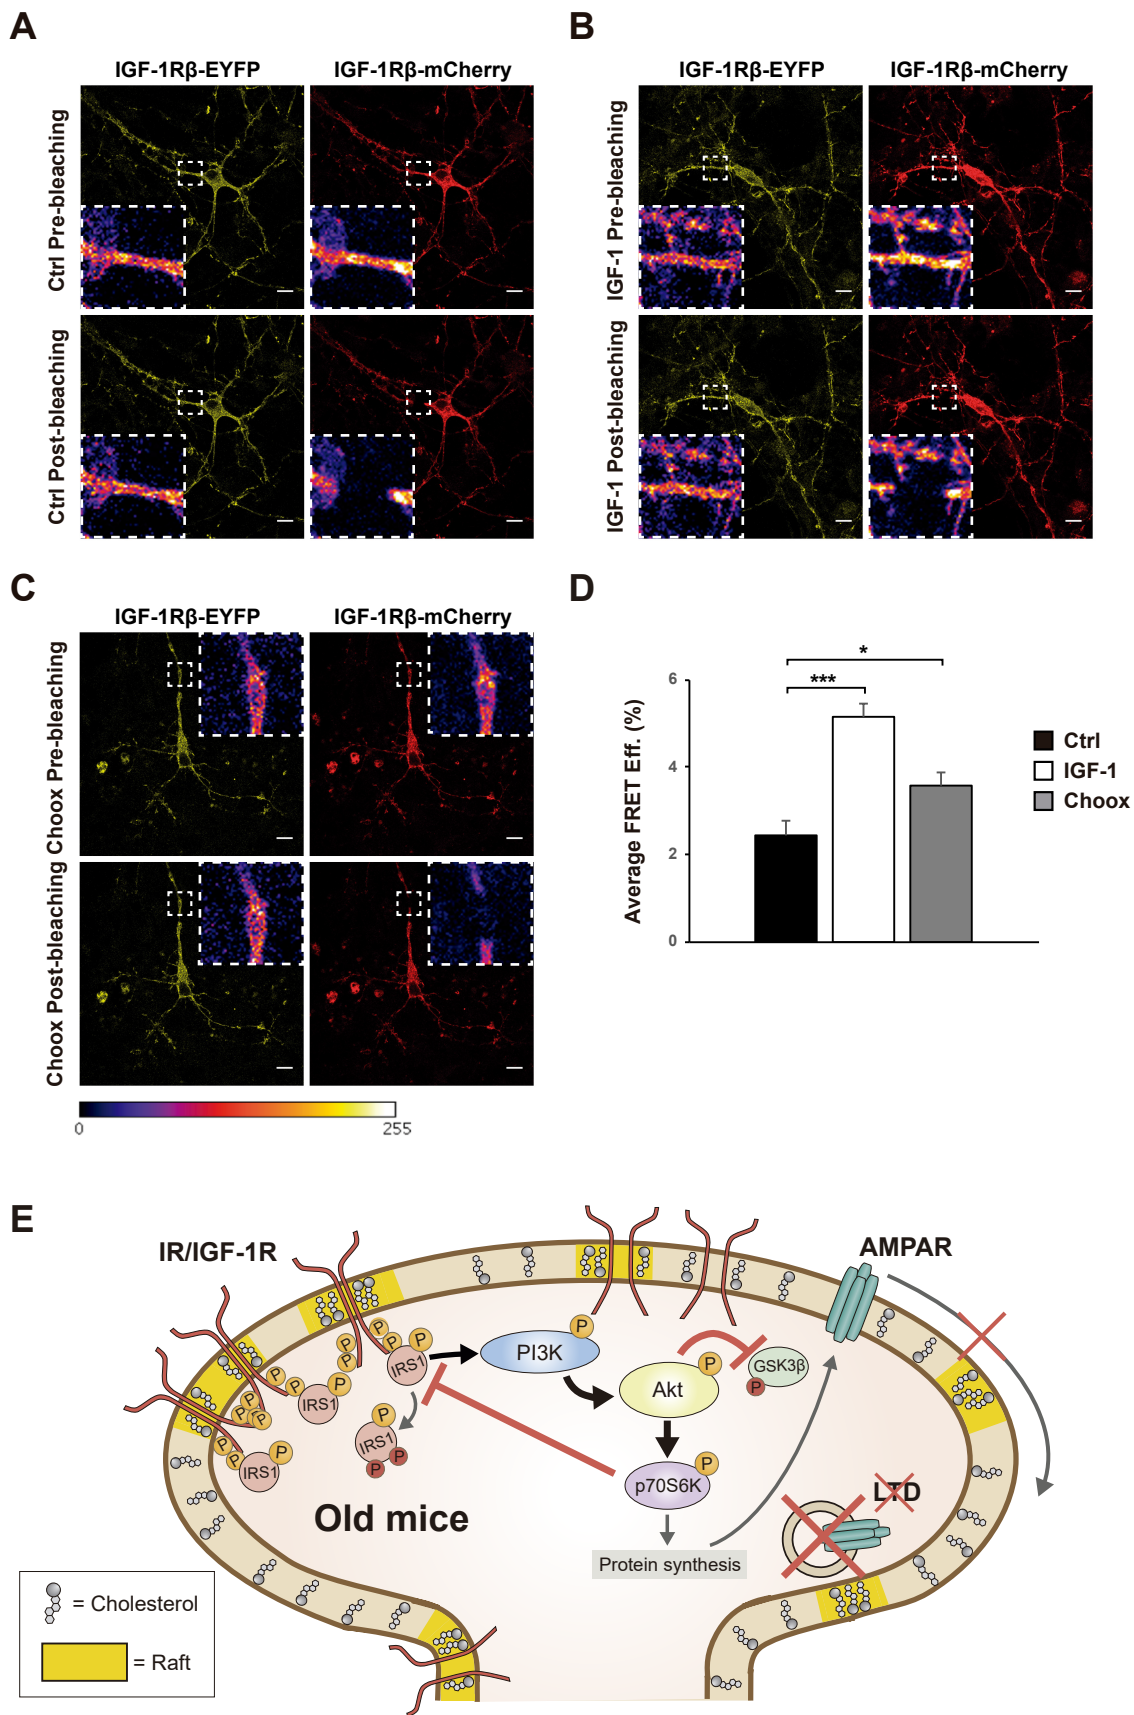



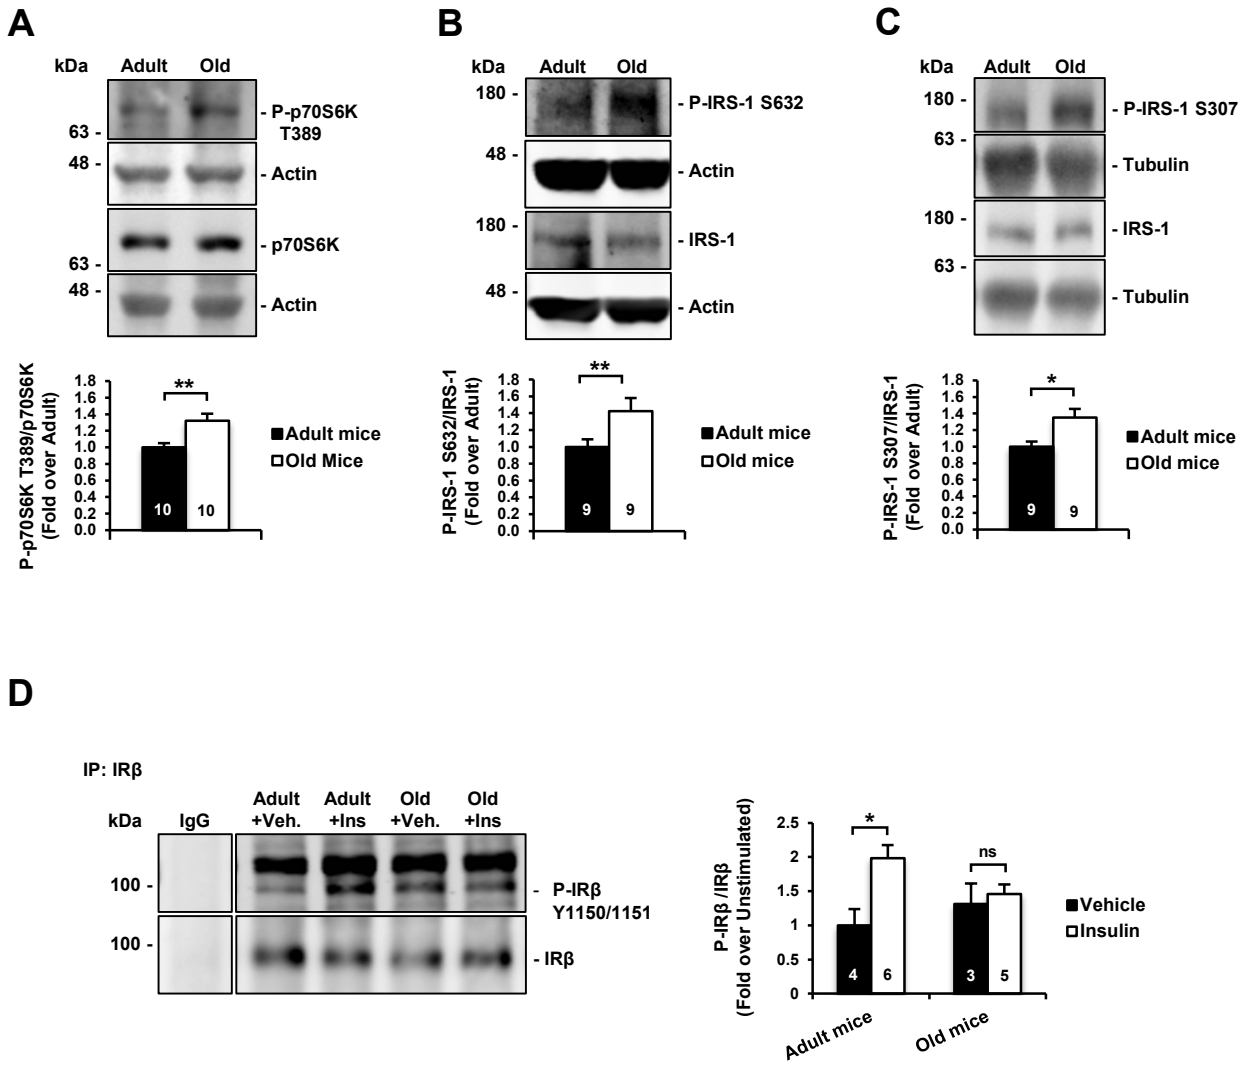

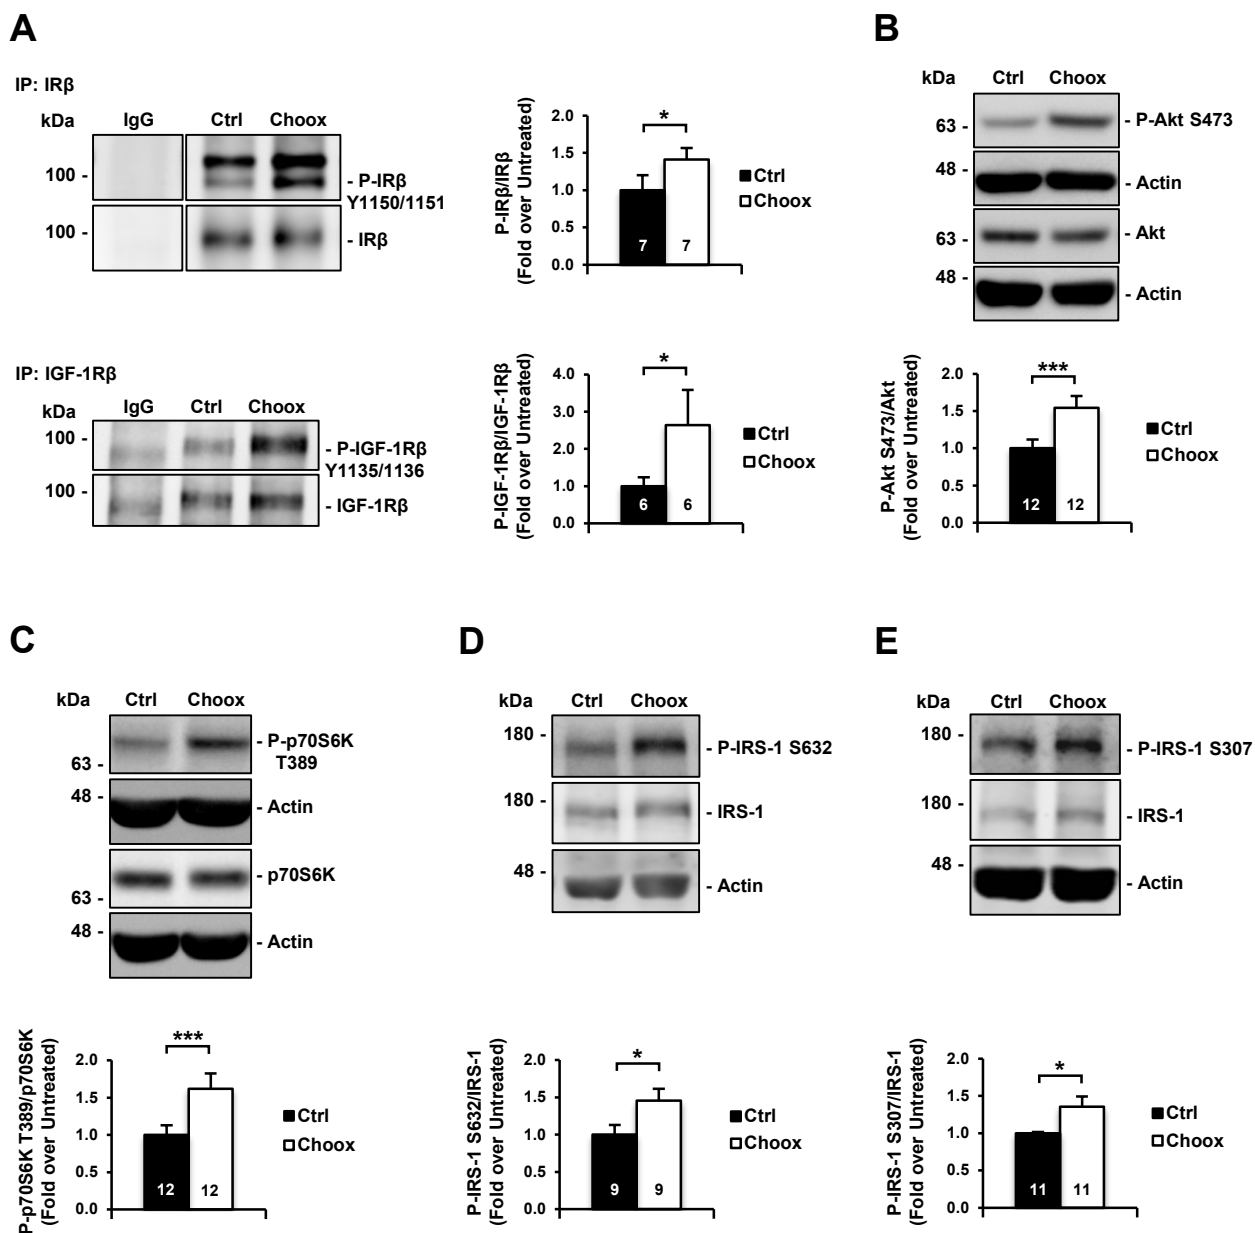

**A**

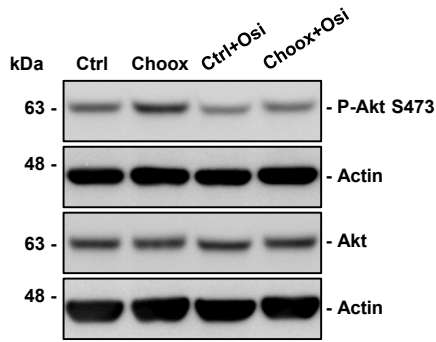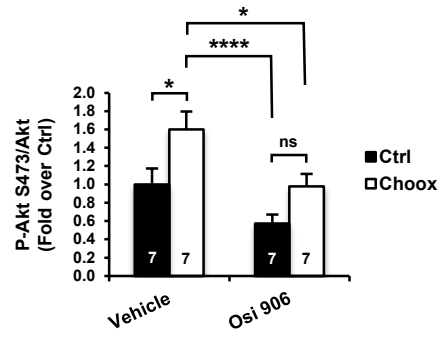

**B**

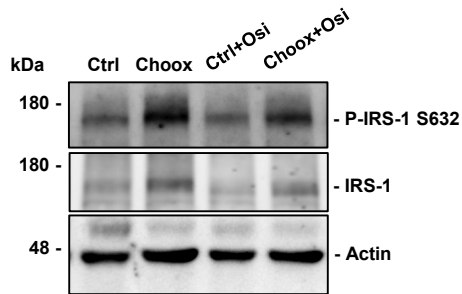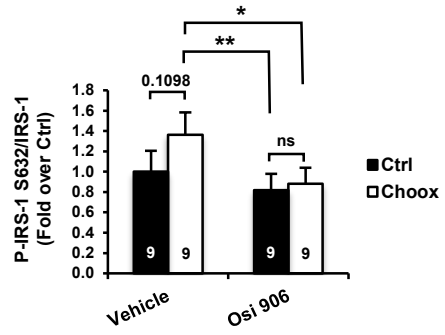

**A**

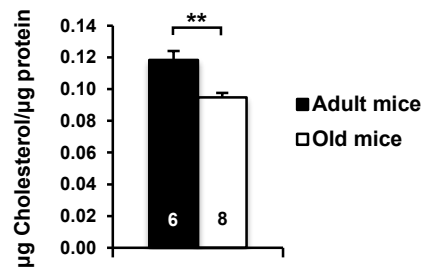

**B**

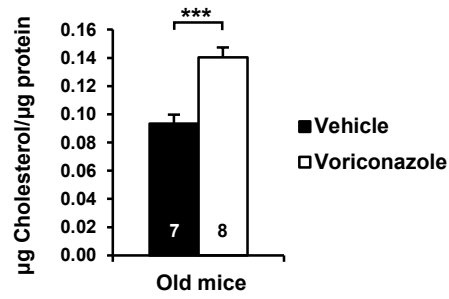

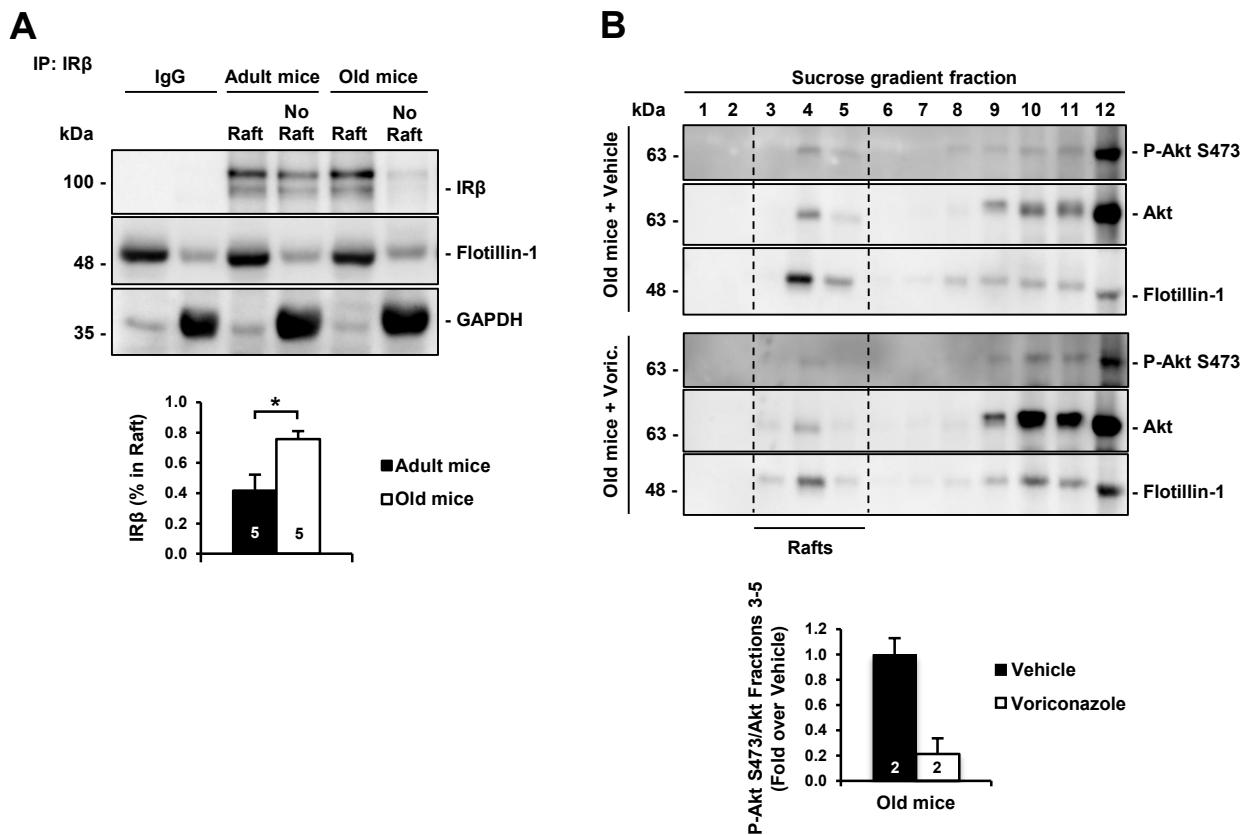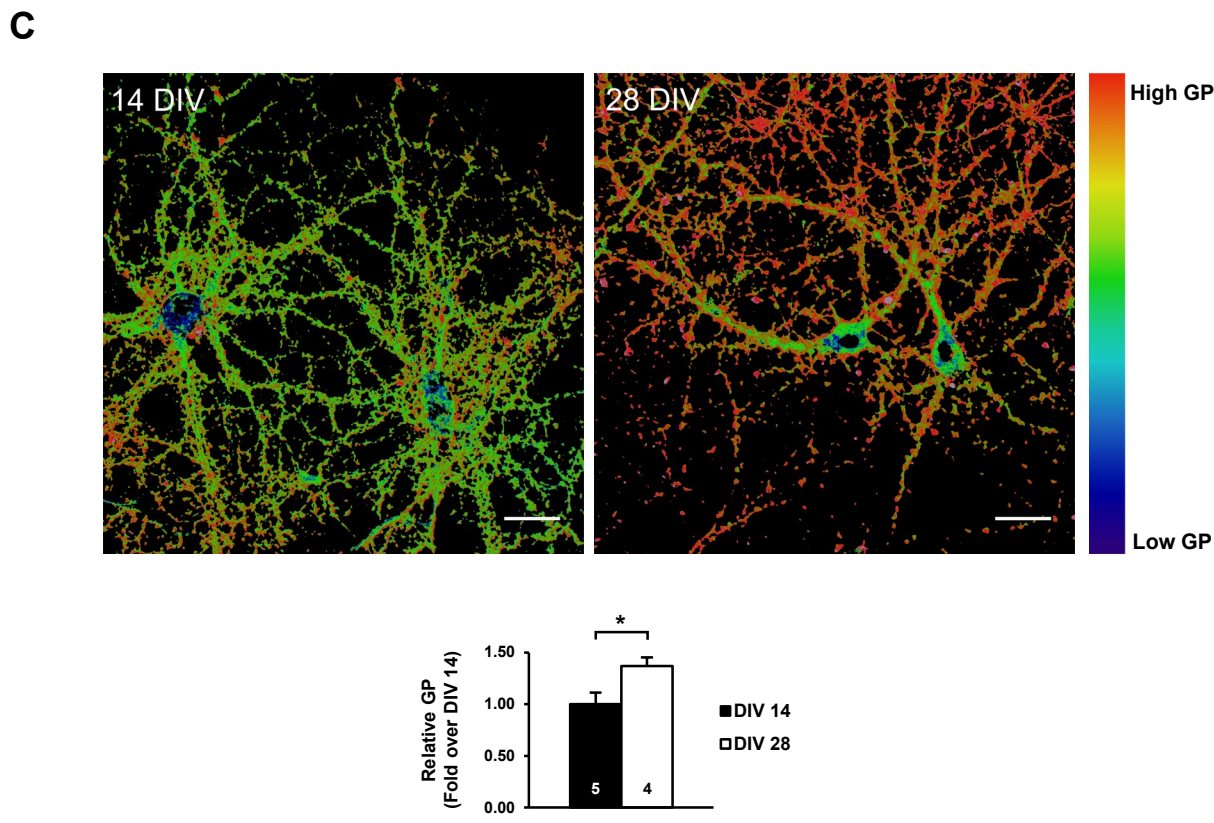

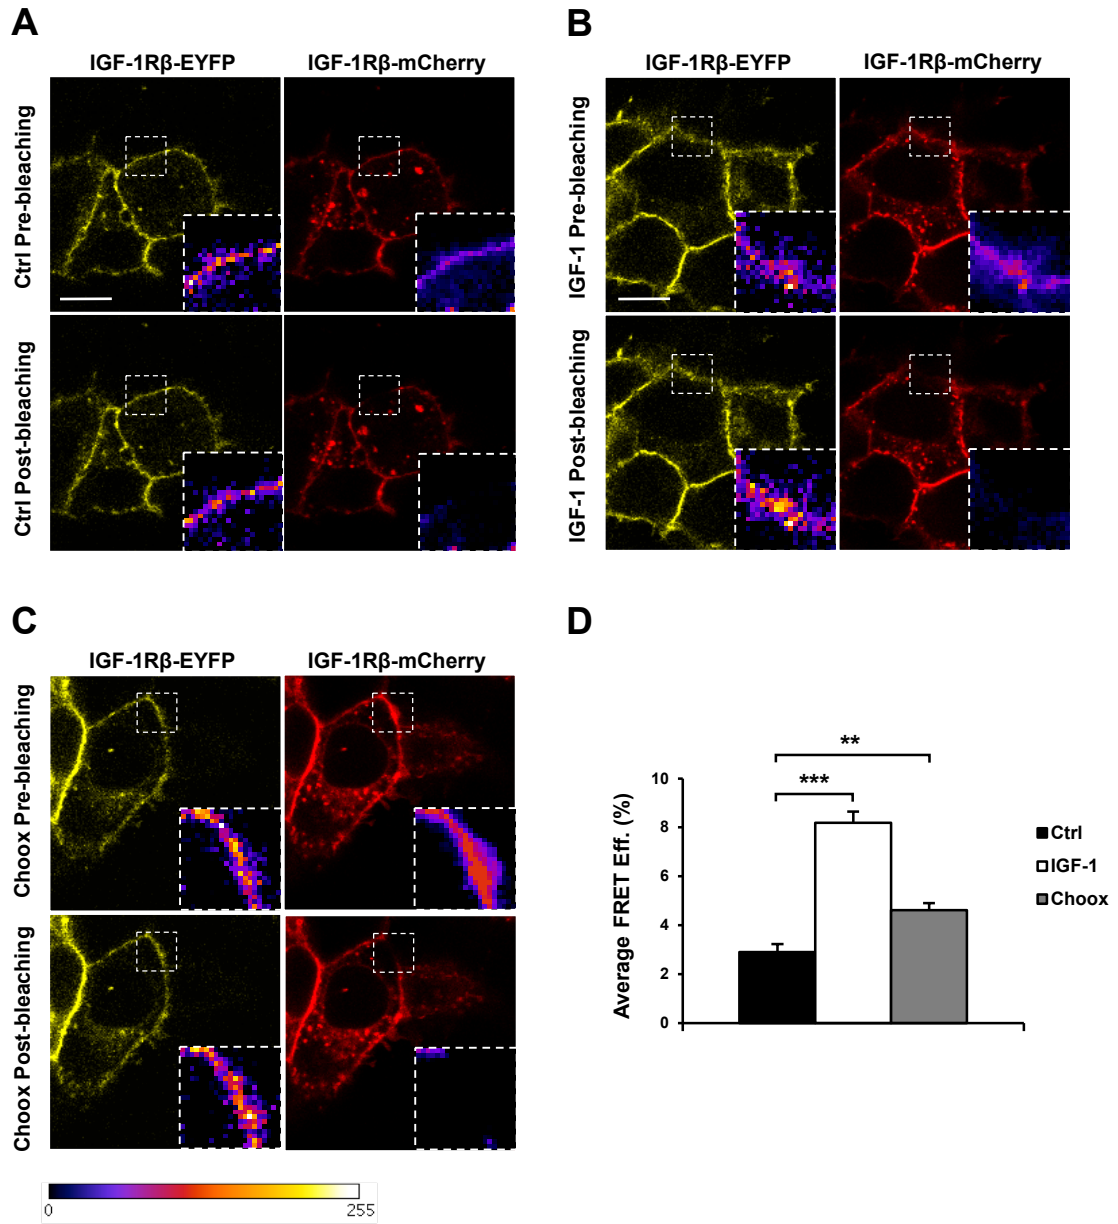



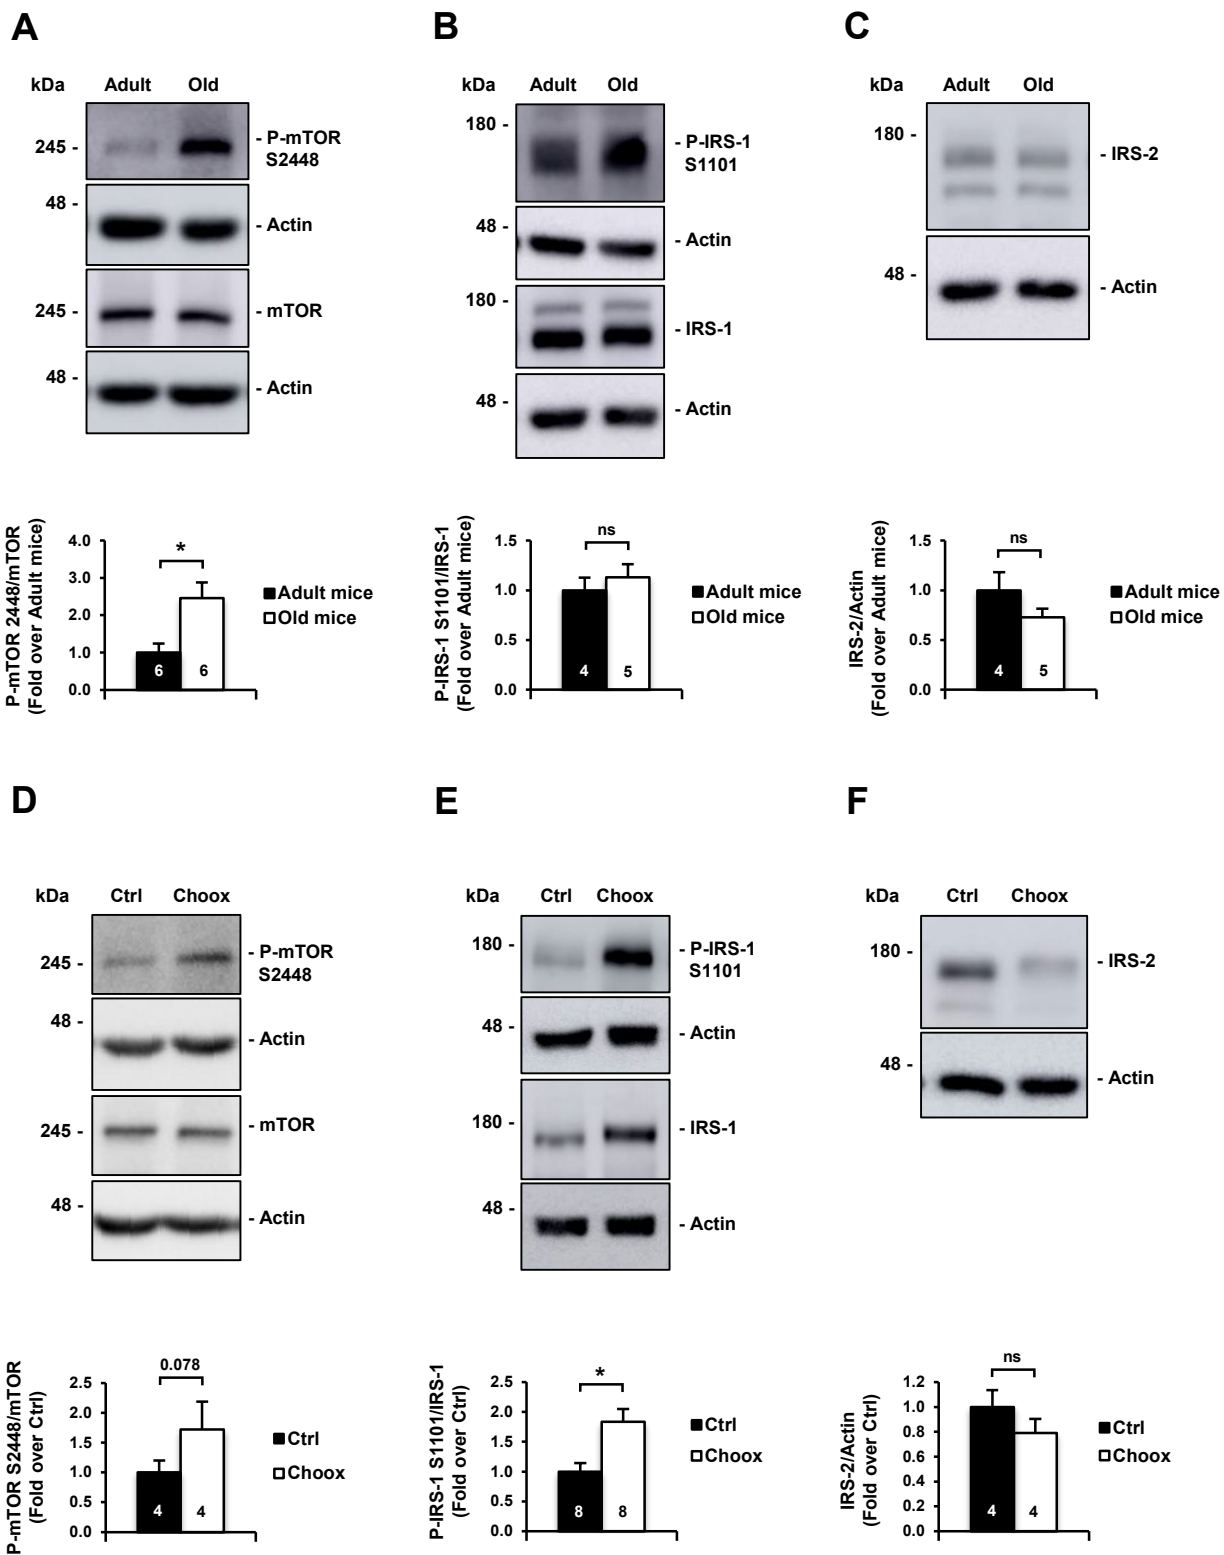

Supplement: ACEL-18-e12932-s001.pdf [file ACEL-18-e12932-s001.pdf]
